# Supplementary material for: Transcriptome Analysis Revealed a Highly Connected Gene Module Associated With Cirrhosis to Hepatocellular Carcinoma Development
Source: Front Genet. 2019 Apr 2;10:305. doi: 10.3389/fgene.2019.00305 (PMC6454075; doi:10.3389/fgene.2019.00305)
Supplement: TABLE S1 — Fold changes of the differentially expressed genes shared in GSE98383, GSE89377, and GSE17548. [file Table_1.XLSX]

## Sheet: Sheet1
Supplementary Table 1. Fold changes of the differentially expressed genes shared in GSE98383, GSE89377 and GSE17548.
Gene Symbol	GSE98383	GSE89377	GSE17548
SPINK1	24.2515	8.45763	7.64921
GPC3	5.02805	4.15611	3.83666
CDC20	7.4127	4.13495	3.36064
UBE2C	2.49666	4.07794	2.81793
TOP2A	10.7779	3.95461	8.00455
PTTG1	3.09513	3.83519	2.34344
PRC1	7.3615	3.32801	3.7942
CCNB2	6.10504	3.16889	3.23557
CDCA5	2.77022	3.11312	2.06951
NUSAP1	3.29436	3.10859	3.21456
MELK	10.1261	2.95667	3.35611
ZIC2	16.9123	2.91801	4.69189
ASPM	12.3805	2.71225	8.26984
AURKA	5.73582	2.61243	2.65259
KIAA0101	4.92458	2.60327	3.50021
MCM2	3.45815	2.56848	2.01685
HMMR	10.3388	2.5442	4.57333
COL1A1	2.18859	2.47189	2.32381
FEN1	3.38698	2.46401	1.88273
KIF20A	6.23332	2.43458	4.36609
RRAGD	6.77396	2.42797	1.75281
CDKN3	5.9794	2.42099	3.99644
NCAPG	8.63383	2.31838	4.1138
UHRF1	2.73208	2.26616	2.33563
CCDC34	3.73213	2.25413	2.00238
CENPF	7.51618	2.23901	4.27739
MCM3	2.58471	2.20233	1.5712
TK1	2.88786	2.1915	1.75769
CENPM	2.82843	2.1392	1.53264
RACGAP1	4.43828	2.11806	3.63682
CKAP2L	2.07053	2.10908	1.94226
UBE2T	3.34035	2.0965	2.83261
STMN1	2.65737	2.0697	1.98628
KNTC1	1.76418	2.04108	1.75574
ZWINT	4.92458	2.0395	3.06456
BIRC5	6.63456	1.99143	3.23798
POLQ	2.86791	1.9786	1.62789
CCNA2	3.86375	1.97662	3.35698
CAP2	3.63008	1.96916	3.22362
FAM83D	7.72749	1.96227	3.5171
AKR1C3	2.54912	1.96094	2.4515
RFC4	2.80889	1.95724	1.90847
OIP5	4.72397	1.9515	2.78515
TTK	7.11074	1.94711	6.03166
MCM4	2.71321	1.94613	2.11562
EXO1	2.15846	1.93755	1.68139
FAM83H	1.84293	1.92414	1.75578
TRIP13	4.65893	1.91971	2.36536
RAD51AP1	4.02782	1.91861	2.92526
SAC3D1	2.08493	1.90759	1.69875
MCM6	2.56685	1.90249	1.79863
FOXM1	5.61778	1.89937	2.42568
IGSF3	4.31691	1.88675	1.69704
CKS2	2.88786	1.8723	2.36451
SMC4	2.90795	1.86454	2.03361
HJURP	3.53081	1.8482	2.07719
CDCA8	3.13834	1.83853	1.65329
KIF4A	5.93809	1.82991	3.33893
EZH2	4.50023	1.82909	2.42562
CDK1	6.86852	1.81935	4.32921
ATAD2	3.24901	1.80329	2.24653
TROAP	1.84038	1.78941	1.72305
HOXA13	7.56846	1.75817	1.97637
PBK	11.0809	1.75243	4.23059
STIL	3.605	1.74975	2.01015
TPX2	3.81055	1.74853	2.56623
PLOD3	1.80876	1.73882	1.52458
POLE2	2.01391	1.73525	1.97871
CKAP4	1.92519	1.73382	1.70086
TUBG1	2.94854	1.73024	1.82694
KIF2C	4.95883	1.72941	2.55178
TMEM106C	3.09513	1.7256	1.51273
NEK2	4.72397	1.70644	4.94774
MCM5	1.74473	1.70131	1.65654
GPSM2	3.27161	1.69774	2.16624
FAM189B	1.93858	1.6949	1.55315
C1orf112	2.23457	1.68542	2.0226
ABCC5	1.73748	1.68336	1.54312
RNASEH2A	2.42839	1.67133	1.99191
PIK3R2	1.55509	1.65518	1.57789
TOMM40L	2.71321	1.65078	1.89492
TMEM38B	1.92652	1.64564	1.58613
NECAB3	1.68997	1.64216	1.61997
SKA1	1.57899	1.63575	1.97799
BUB1	4.95883	1.63213	3.53536
SAE1	2.14355	1.62639	1.67359
NSMCE2	2.26577	1.62631	1.64128
FLAD1	2.15846	1.62315	1.53079
DENR	1.56374	1.62284	1.53633
CKAP5	2.15846	1.62109	1.62468
ECT2	4.92458	1.60925	3.63033
BARD1	1.96292	1.60501	1.54427
CDKN2A	2.36199	1.59286	2.22831
PLK4	2.47942	1.59219	1.58702
MAD2L1	5.42642	1.59132	3.13079
CENPE	2.75108	1.59102	2.30464
GTSE1	1.93187	1.58016	2.38998
SOX13	1.54435	1.57496	1.53387
JADE3	1.85961	1.57431	1.67009
CDCA3	4.14106	1.57109	2.32007
SPDL1	2.63902	1.57042	1.94607
H2AFZ	3.05252	1.56946	1.56123
PSMD4	1.98343	1.56648	1.84243
TTC13	1.55509	1.56444	1.6
RRM2	8.11168	1.56287	5.25062
PRKDC	2.07053	1.55637	1.83961
MCM8	3.36359	1.55549	2.09668
CEP55	4.82323	1.5504	3.99045
KIAA1429	2.05623	1.54081	1.57482
C8orf33	2.17347	1.53967	1.79255
RFX5	2.28153	1.53685	1.59109
IRAK1	1.70291	1.52918	1.74476
POGK	1.64148	1.52774	1.51425
KIF23	4.65893	1.52651	2.67641
GAS2L3	2.80889	1.52549	2.13604
SNX27	1.56591	1.52319	1.52249
CDK5	2.8481	1.51946	1.60118
KLF13	1.65634	1.51633	1.6261
TP53BP2	1.75321	1.51396	1.58651
FANCD2	2.54912	1.51374	1.75057
DDX39A	2.17347	1.51314	1.65328
PIEZO2	3.91768	1.51211	1.68203
XPO5	2.05623	1.51033	1.54949
ATP6V1C1	2.39496	1.50431	1.77771
DLGAP5	8	1.50275	3.95055
CCBE1	0.603322	0.665986	0.578002
RGN	0.420448	0.664603	0.576007
TNFRSF1B	0.420448	0.663822	0.579165
F3	0.312083	0.662227	0.471722
ITGA9	0.542239	0.662066	0.475009
MPC1	0.469761	0.661975	0.507183
PDE8B	0.660669	0.66021	0.573108
IVD	0.544876	0.659457	0.610231
PLA2G5	0.592957	0.657843	0.628962
MLYCD	0.615999	0.656419	0.580249
SLC17A1	0.526316	0.656147	0.556533
CPT2	0.604997	0.655214	0.586424
PINK1	0.598739	0.654212	0.636178
TSPYL5	0.378929	0.653895	0.569168
TGFA	0.366021	0.651552	0.631648
CYP2B6	0.618566	0.651544	0.430652
ZEB2	0.482968	0.650968	0.54615
PAPSS2	0.655197	0.650121	0.660726
IL18R1	0.593368	0.645225	0.574915
CD81	0.59791	0.644077	0.654087
BMP5	0.568803	0.64122	0.448047
NDRG2	0.627636	0.639321	0.414512
N4BP2L1	0.532923	0.639182	0.65309
MCL1	0.555169	0.638822	0.644334
CD5L	0.164938	0.632346	0.36399
TEK	0.378929	0.632311	0.617476
MASP1	0.486327	0.630503	0.622712
MYOM2	0.323088	0.627744	0.601923
P3H2	0.423373	0.626224	0.582951
RSPO3	0.14161	0.625127	0.339047
CD300A	0.64797	0.625043	0.663979
CST7	0.506628	0.62372	0.640129
DNALI1	0.48971	0.62274	0.657843
CLEC4M	0.248273	0.615576	0.253327
DHODH	0.493116	0.614269	0.585019
PDGFC	0.564874	0.613541	0.605464
ENDOD1	0.590087	0.61161	0.619232
MBNL2	0.642158	0.609721	0.643613
MEIS3P1	0.323088	0.609642	0.521529
RBMS3	0.662504	0.608643	0.628309
CSAD	0.627201	0.607317	0.596681
EIF4E3	0.585605	0.606289	0.665433
AXL	0.214641	0.603863	0.5292
FYN	0.657927	0.602608	0.642166
BHLHE22	0.325335	0.598463	0.664304
TCF21	0.373712	0.59837	0.498934
CDHR2	0.153893	0.591847	0.320219
STEAP4	0.108067	0.591446	0.468358
GPM6A	0.604997	0.591423	0.276355
IL1RL1	0.614719	0.590912	0.428127
ADGRG7	0.10083	0.589658	0.254436
SLC4A4	0.59378	0.586778	0.665597
BCKDHB	0.63905	0.580536	0.506822
TUBE1	0.429283	0.580444	0.476156
TRIM22	0.25	0.580206	0.416812
F11	0.343885	0.579512	0.37552
NADK2	0.5	0.579313	0.619838
GGT5	0.444421	0.577823	0.560341
CDH19	0.381565	0.57379	0.650722
CD8A	0.473029	0.573406	0.595807
GALNT16	0.371131	0.572822	0.646392
LDOC1	0.432269	0.571908	0.662974
ACSM3	0.553632	0.57129	0.446009
ETFDH	0.503129	0.570487	0.499641
CFP	0.267943	0.569914	0.415468
TTC36	0.107321	0.568911	0.215071
OIT3	0.049721	0.565248	0.142685
PLPP3	0.476319	0.564474	0.642379
HAND2-AS1	0.358489	0.564376	0.482462
HLF	0.325335	0.563754	0.586207
TM6SF2	0.608783	0.563681	0.537447
DEPDC7	0.295248	0.561089	0.453129
MS4A7	0.479632	0.560831	0.616154
GNE	0.479632	0.559488	0.549947
LYVE1	0.518351	0.550998	0.512313
SPATA18	0.456916	0.550958	0.37158
LIFR	0.403321	0.549695	0.399725
ZFP36	0.386891	0.548945	0.522699
RGS4	0.400535	0.548866	0.64735
OLFM1	0.618138	0.54825	0.518765
SLC38A2	0.432269	0.548238	0.658294
SFRP1	0.456916	0.547518	0.625475
EPHA3	0.144586	0.543257	0.388758
SPRYD4	0.636839	0.538764	0.498284
PDE7B	0.389582	0.535409	0.565975
ACAA2	0.534033	0.535262	0.655015
STOM	0.368567	0.535095	0.607683
CD1D	0.613442	0.534164	0.38025
ALDH8A1	0.52015	0.533762	0.286586
SRGN	0.426317	0.533424	0.568554
ALAS1	0.348686	0.533369	0.491612
DSE	0.351111	0.531142	0.514514
COLEC10	0.234881	0.529012	0.402981
ANTXR2	0.493116	0.527933	0.658159
CSRNP1	0.329877	0.527376	0.505324
ECM1	0.339151	0.525545	0.328435
TRPM8	0.332171	0.522243	0.313001
PANK1	0.476319	0.519368	0.530543
SKAP1	0.617281	0.518796	0.52668
ATOH8	0.523042	0.518696	0.523416
PYROXD2	0.5544	0.515148	0.641266
PLAC8	0.210224	0.515118	0.337798
MAN1C1	0.378929	0.513966	0.491745
AGTR1	0.547147	0.511171	0.574704
DACH1	0.279322	0.509793	0.621318
RCAN1	0.31864	0.504729	0.468809
CFHR3	0.162668	0.501145	0.475646
AGXT2	0.438303	0.500946	0.398212
CYP4F2	0.384219	0.4981	0.347377
FAM134B	0.444421	0.496603	0.424102
LILRB5	0.527046	0.491704	0.51158
MAMDC2	0.426317	0.487863	0.432679
CYGB	0.432269	0.483118	0.505133
GLYAT	0.423373	0.482895	0.410745
HAO1	0.392292	0.480365	0.292062
PBLD	0.537375	0.479762	0.381488
SOCS2	0.493116	0.479488	0.61171
CAT	0.567621	0.479306	0.559751
CA2	0.511569	0.478626	0.355318
C8orf4	0.293209	0.478411	0.410782
C1R	0.525586	0.478396	0.507411
FCN2	0.334482	0.47822	0.304547
RCL1	0.432269	0.477963	0.562063
CTSO	0.586824	0.477046	0.580062
EDNRB	0.432269	0.475804	0.54307
TMEM154	0.157127	0.475486	0.505713
FCER1A	0.653836	0.471121	0.538687
CETP	0.160428	0.46913	0.368622
FBLN5	0.279322	0.468039	0.46315
MS4A6A	0.400535	0.468033	0.61606
GABARAPL1	0.482968	0.466079	0.536838
CFTR	0.15822	0.464435	0.417734
CD163	0.408951	0.46041	0.465047
RHOB	0.524131	0.460334	0.59501
CCDC3	0.289172	0.456161	0.558388
IL7R	0.334482	0.456035	0.491191
ID2	0.417544	0.452587	0.657221
SLCO1B1	0.503827	0.452559	0.44888
PTGS2	0.591316	0.452451	0.507069
NTF3	0.516915	0.451395	0.637792
CTH	0.260616	0.450633	0.309854
CYP39A1	0.373712	0.449867	0.555909
KLF4	0.665726	0.448881	0.478441
OLFML3	0.20166	0.444265	0.490449
KCNJ16	0.236514	0.443808	0.271983
STEAP3	0.50698	0.443328	0.51965
CPED1	0.432269	0.441193	0.647535
TKFC	0.592136	0.440188	0.647675
DNAJC12	0.262429	0.439993	0.574105
EGR1	0.30566	0.439789	0.516295
ACSL5	0.456916	0.438829	0.624493
LHX2	0.225313	0.438558	0.451065
ALDH6A1	0.482968	0.436655	0.591993
CD69	0.166086	0.436635	0.363445
TIMD4	0.25349	0.436616	0.481822
SOCS3	0.258816	0.436613	0.45324
TMEM100	0.166086	0.436445	0.426549
GHR	0.15283	0.435449	0.232835
GLS2	0.339151	0.435316	0.238159
FMO3	0.505226	0.434629	0.515396
CP	0.456916	0.434387	0.43376
CIDEB	0.266093	0.428884	0.442038
FMO2	0.329877	0.42253	0.587775
HSD17B2	0.307786	0.42194	0.542834
S100A8	0.444421	0.421863	0.448827
GZMK	0.378929	0.421591	0.525435
PODN	0.650671	0.421504	0.638668
IL1RAP	0.395021	0.418453	0.658615
ID1	0.135842	0.416734	0.445197
CNDP1	0.115824	0.41254	0.245099
KBTBD11	0.277392	0.412324	0.395056
ADAMTS1	0.408951	0.411862	0.423526
MFSD2A	0.456916	0.409932	0.620423
IGFBP3	0.173139	0.408495	0.320584
GNMT	0.194791	0.404587	0.399684
RND3	0.343885	0.403764	0.401303
LPA	0.103665	0.399109	0.151804
LCAT	0.0973956	0.38977	0.260213
ADH6	0.420448	0.387247	0.453892
SVEP1	0.512634	0.380889	0.603842
PRSS8	0.566835	0.379957	0.439228
MT2A	0.343885	0.377394	0.458564
A2M	0.444421	0.375907	0.599737
LY6E	0.248273	0.373998	0.268926
THBS1	0.469761	0.36239	0.532233
CXCL14	0.0902456	0.360556	0.157385
APCS	0.538493	0.358181	0.398052
PZP	0.45376	0.356578	0.288353
TMEM27	0.473029	0.355232	0.172125
MARCO	0.0847878	0.35483	0.346616
CRHBP	0.0842021	0.353365	0.150544
TMEM45A	0.219151	0.348325	0.259027
RBP1	0.190782	0.346864	0.559477
HAO2	0.325335	0.34673	0.387066
PLCXD3	0.408951	0.345409	0.427765
ANGPTL6	0.303549	0.344377	0.383865
SFRP5	0.603322	0.343465	0.507726
PAMR1	0.397768	0.342839	0.634797
CRISPLD2	0.170755	0.342438	0.456753
CCL21	0.411796	0.337752	0.368174
DNASE1L3	0.363493	0.334667	0.490239
CLEC4G	0.101532	0.327789	0.162683
MBL2	0.0915054	0.324394	0.315712
FOS	0.180491	0.321251	0.395213
IGFALS	0.403321	0.320136	0.425381
C9	0.157127	0.315972	0.177161
COLEC11	0.20166	0.310838	0.385886
MT1F	0.376312	0.310263	0.36913
MZB1	0.395021	0.309257	0.581047
CCL2	0.222211	0.302604	0.393072
PTH1R	0.482968	0.300696	0.460502
CXCL12	0.104386	0.296273	0.366508
NAT2	0.273573	0.292644	0.225942
CYR61	0.225313	0.291858	0.424715
C1QTNF1	0.58927	0.290043	0.526685
ADH1B	0.389582	0.289645	0.445191
SLC25A47	0.0902456	0.284315	0.20074
CYP2A7	0.555169	0.278434	0.357576
MT1M	0.339151	0.275533	0.201372
CYP2A6	0.408951	0.265829	0.345259
SRPX	0.130308	0.263958	0.214084
PEMT	0.303549	0.263377	0.490901
FAM150B	0.156041	0.262799	0.332884
CH25H	0.115023	0.260794	0.393671
DPT	0.283221	0.252698	0.373673
CCL19	0.116629	0.249482	0.280586
C11orf96	0.151774	0.245217	0.325748
VIPR1	0.441351	0.244877	0.464524
EPCAM	0.046714	0.243663	0.369847
INMT	0.171943	0.242693	0.4008
CLIC6	0.192109	0.241523	0.521583
PDGFRA	0.661127	0.241258	0.22664
ADAMTSL2	0.243164	0.238373	0.3907
CLEC1B	0.0871715	0.236119	0.206928
CLDN10	0.138696	0.23415	0.35265
APOF	0.160428	0.229668	0.138099
DCN	0.520511	0.228725	0.286072
SLCO1B3	0.0363979	0.213412	0.162266
THRSP	0.289172	0.209541	0.390281
FOSB	0.11908	0.204525	0.364117
CYP2C9	0.5	0.201905	0.526372
JCHAIN	0.0947323	0.200427	0.192147
MFAP4	0.293209	0.200406	0.441041
DBH	0.384219	0.194901	0.569602
TACSTD2	0.0651541	0.193955	0.279173
ADH4	0.600402	0.17537	0.618074
CYP3A4	0.560583	0.170376	0.547794
HAMP	0.0308198	0.149148	0.250225
C7	0.283221	0.14374	0.410011
CHST4	0.164938	0.127226	0.409984
CYP2E1	0.580754	0.126472	0.604653
CYP1A2	0.194791	0.124647	0.202669
